# Supplementary material
Source: bioRxiv or medRxiv preprint supplement (http://biorxiv.org/highwire/filestream/28107/field_highwire_adjunct_files/0/098533-1.pdf)
Supplement: Supplementary file [file 098533-1.pdf]

1 Appendix S1

2 **Parasite escape through trophic specialization in a species flock**

3 Pascal I. Hablützel<sup>1</sup>, Maarten P.M. Vanhove<sup>1,2,3</sup>, Pablo Deschepper<sup>4</sup>, Arnout F. Grégoir<sup>5</sup>, Anna K.

4 Roose<sup>1</sup>, Filip A.M. Volckaert<sup>1</sup>, Joost A.M. Raeymaekers<sup>1,6</sup>

5

6 Table S1: Numbers of host individuals with a certain parasite count.

| Species | Nematoda |    |   |   |   |   |
|---------|----------|----|---|---|---|---|
|         | 0        | 1  | 2 | 3 | 4 | 7 |
| Ctho    | 19       | 1  |   | 1 |   |   |
| Gnpf    | 15       | 4  |   | 1 |   |   |
| Lida    | 6        |    |   |   |   |   |
| Lola    | 19       | 2  |   |   |   |   |
| Inlo    | 6        |    |   |   |   |   |
| Pefam   | 12       |    |   |   |   |   |
| Pefas   | 8        | 2  | 1 |   |   |   |
| Psba    | 9        | 2  |   |   |   |   |
| Pscu    | 6        |    |   |   |   |   |
| Sidi    | 56       | 13 | 1 |   | 1 |   |
| Trmo    | 166      | 12 | 1 |   |   | 1 |

7

| Species | Digenea |   |   |
|---------|---------|---|---|
|         | 0       | 1 | 4 |
| Ctho    | 21      |   |   |
| Gnpf    | 20      |   |   |
| Lida    | 6       |   |   |
| Lola    | 20      | 1 |   |
| Inlo    | 6       |   |   |
| Pefam   | 11      |   | 1 |
| Pefas   | 11      |   |   |
| Psba    | 11      |   |   |
| Pscu    | 6       |   |   |
| Sidi    | 73      |   |   |
| Trmo    | 180     |   |   |

8

9

10

| Species | cysts (intestines) |   |   |
|---------|--------------------|---|---|
|         | 0                  | 1 | 2 |
| Ctho    | 21                 |   |   |
| Gnpf    | 20                 |   |   |
| Lida    | 6                  |   |   |
| Lola    | 20                 |   | 1 |
| Inlo    | 5                  | 1 |   |
| Pefam   | 12                 |   |   |
| Pefas   | 11                 |   |   |
| Psba    | 11                 |   |   |
| Pscu    | 6                  |   |   |
| Sidi    | 70                 | 1 |   |
| Trmo    | 180                |   |   |

11

| Species | <i>Gyrodactylus</i> |    |   |   |   |   |    |  |
|---------|---------------------|----|---|---|---|---|----|--|
|         | 0                   | 1  | 2 | 3 | 4 | 5 | 35 |  |
| Ctho    | 21                  |    |   |   |   |   |    |  |
| Gnpf    | 20                  | 1  |   |   |   |   |    |  |
| Lida    | 5                   | 1  |   |   |   |   |    |  |
| Lola    | 18                  | 2  | 1 |   |   |   |    |  |
| Inlo    | 6                   | 1  |   |   |   |   |    |  |
| Pefam   | 11                  | 1  |   |   |   |   |    |  |
| Pefas   | 10                  | 1  |   |   |   |   |    |  |
| Psba    | 10                  | 1  |   |   |   |   |    |  |
| Pscu    | 6                   |    |   |   |   |   |    |  |
| Sidi    | 60                  | 5  | 4 | 1 | 2 | 0 | 1  |  |
| Trmo    | 158                 | 12 | 4 | 2 | 1 | 3 |    |  |

12

| Species | Maxillipoda |   |
|---------|-------------|---|
|         | 0           | 1 |
| Ctho    | 20          |   |
| Gnpf    | 21          |   |
| Lida    | 2           |   |
| Lola    | 21          |   |
| Inlo    | 0           |   |
| Pefam   | 11          |   |
| Pefas   | 11          |   |
| Psba    | 11          |   |
| Pscu    | 6           |   |
| Sidi    | 69          |   |
| Trmo    | 176         | 2 |

13

***Urogyrus***

| Species | 0   | 1 | 2 | 3 | 4 | 5 |
|---------|-----|---|---|---|---|---|
| Ctho    | 20  | 1 |   |   |   |   |
| Gnpf    | 17  |   | 1 | 1 |   | 1 |
| Lida    | 6   |   |   |   |   |   |
| Lola    | 18  | 1 |   | 1 | 1 |   |
| Inlo    | 6   |   |   |   |   |   |
| Pefam   | 12  |   |   |   |   |   |
| Pefas   | 11  |   |   |   |   |   |
| Psba    | 10  | 1 |   |   |   |   |
| Pscu    | 6   |   |   |   |   |   |
| Sidi    | 71  |   |   |   |   |   |
| Trmo    | 176 | 2 | 1 | 1 |   |   |

14

15

***Enterogyrus***

| Species | 0   | 1 | 2 |
|---------|-----|---|---|
| Ctho    | 20  |   | 1 |
| Gnpf    | 20  |   |   |
| Lida    | 5   | 1 |   |
| Lola    | 21  |   |   |
| Inlo    | 6   |   |   |
| Pefam   | 11  | 1 |   |
| Pefas   | 11  |   |   |
| Psba    | 11  |   |   |
| Pscu    | 6   |   |   |
| Sidi    | 70  | 1 |   |
| Trmo    | 180 |   |   |

16

**cysts (gills)**

| Species | 0   | 1 |
|---------|-----|---|
| Ctho    | 20  | 1 |
| Gnpf    | 21  |   |
| Lida    | 2   |   |
| Lola    | 16  |   |
| Inlo    | 0   |   |
| Pefam   | 12  |   |
| Pefas   | 11  |   |
| Psba    | 11  |   |
| Pscu    | 6   |   |
| Sidi    | 70  |   |
| Trmo    | 185 |   |

17

| Species | cysts (fins) |   |   |   |
|---------|--------------|---|---|---|
|         | 0            | 1 | 2 | 6 |
| Ctho    | 20           | 1 |   |   |
| Gnpf    | 20           |   |   |   |
| Lida    | 6            |   |   |   |
| Lola    | 21           |   |   |   |
| Inlo    | 6            |   |   |   |
| Pefam   | 12           |   |   |   |
| Pefas   | 10           | 1 |   |   |
| Psba    | 11           |   |   |   |
| Pscu    | 6            |   |   |   |
| Sidi    | 68           | 2 |   | 1 |
| Trmo    | 177          | 2 | 1 |   |

18

19

20 Table S2: Results of the generalized linear model explaining the abundance of *Acanthocephala*,  
 21 *Cichlidogyrus* and *Ergasilus* for eleven host species at three sampling sites. The full model includes  
 22 host species, sampling site, host standard length and host sex as explanatory variables. To assess the  
 23 relative importance of each predictor,  $\Delta$  Residual deviance and  $\Delta$  Akaike Information Criterion (AIC)  
 24 were calculated by a leave-one-out strategy.

***Acanthocephala***

| Model      | Null deviance | DF  | Residual deviance | DF  | AIC     | $\Delta$ Residual deviance | $\Delta$ AIC |
|------------|---------------|-----|-------------------|-----|---------|----------------------------|--------------|
| Full model | 1014.81       | 149 | 602.55            | 134 | 944.14  | NA                         | NA           |
| - Species  | 1014.81       | 149 | 911.44            | 144 | 1233.00 | -308.89                    | -288.86      |
| - Site     | 1014.81       | 149 | 639.99            | 136 | 977.59  | -37.44                     | -33.45       |
| - SL       | 1014.81       | 149 | 604.09            | 135 | 943.69  | -1.54                      | 0.45         |
| - Sex      | 1014.81       | 149 | 619.44            | 136 | 957.03  | -16.89                     | -12.89       |

***Cichlidogyrus***

| Model      | Null deviance | DF  | Residual deviance | DF  | AIC    | $\Delta$ Residual deviance | $\Delta$ AIC |
|------------|---------------|-----|-------------------|-----|--------|----------------------------|--------------|
| Full model | 5841.7        | 149 | 2198              | 134 | 2779.6 | NA                         | NA           |
| - Species  | 5841.7        | 149 | 3632.50           | 144 | 4193.7 | -1434.5                    | -1414.1      |
| - Site     | 5841.7        | 149 | 2593.4            | 136 | 3170.5 | -395.4                     | -390.9       |
| - SL       | 5841.7        | 149 | 3142.9            | 135 | 3722.1 | -944.9                     | -942.5       |
| - Sex      | 5841.7        | 149 | 2265.5            | 136 | 2842.6 | -67.5                      | -63.0        |

***Ergasilus***

| Model      | Null deviance | DF  | Residual deviance | DF  | AIC    | $\Delta$ Residual deviance | $\Delta$ AIC |
|------------|---------------|-----|-------------------|-----|--------|----------------------------|--------------|
| Full model | 1413.92       | 148 | 409.31            | 133 | 829.65 | NA                         | NA           |
| - Species  | 1413.92       | 148 | 1081.60           | 143 | 1421.9 | -672.29                    | -592.25      |
| - Site     | 1413.92       | 148 | 578.02            | 135 | 934.36 | -168.71                    | -104.71      |
| - SL       | 1413.92       | 148 | 633.33            | 134 | 991.67 | -224.02                    | -162.02      |
| - Sex      | 1413.92       | 148 | 471.51            | 136 | 827.85 | -62.2                      | 1.8          |

25

26

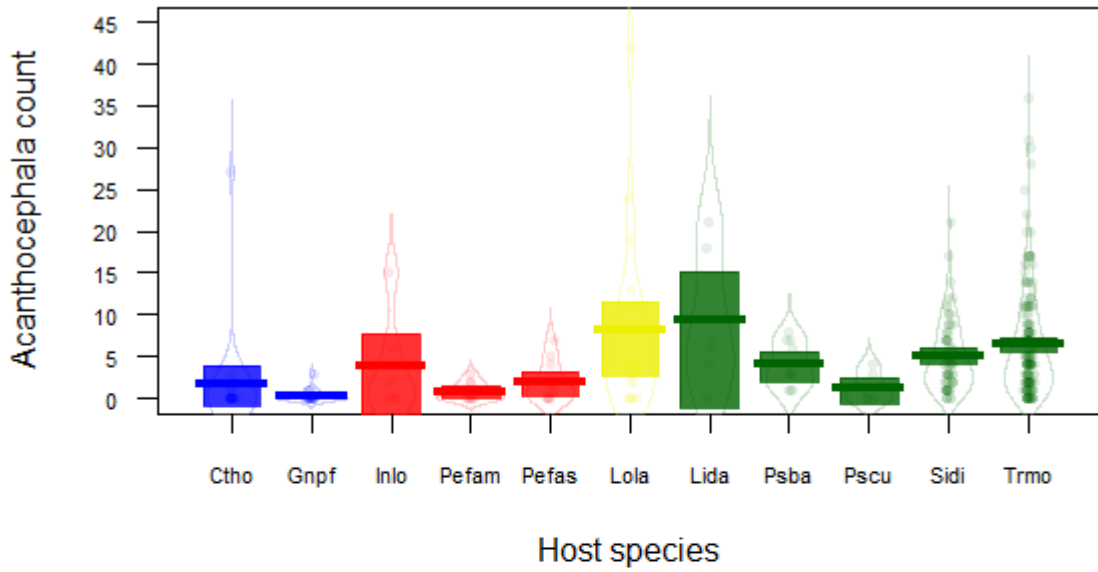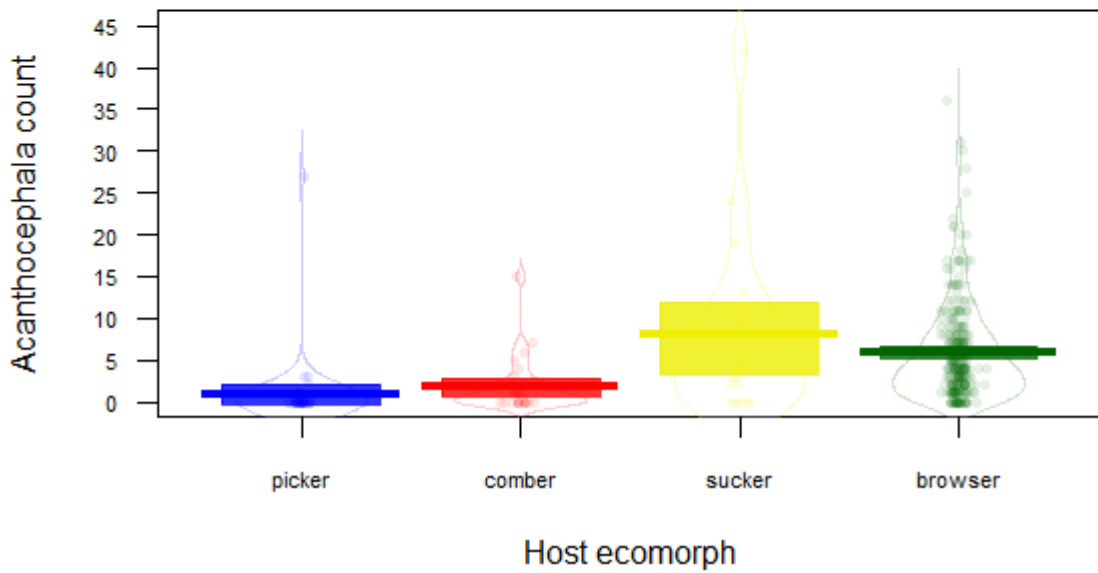

27

28 Fig. S1: Raw Acanthocephala counts in eleven Tropheini species (upper panel) and the four trophic  
 29 ecomorphs (lower panel). Colours refer to different ecomorphs. Plots are drawn in R using the  
 30 *pirateplot* function of the *yarr* package (Phillips, 2016). Points are raw data, beans illustrate density  
 31 of points, bars depict mean counts and boxes represent 95 % Bayesian Highest Density Intervals.

32

33

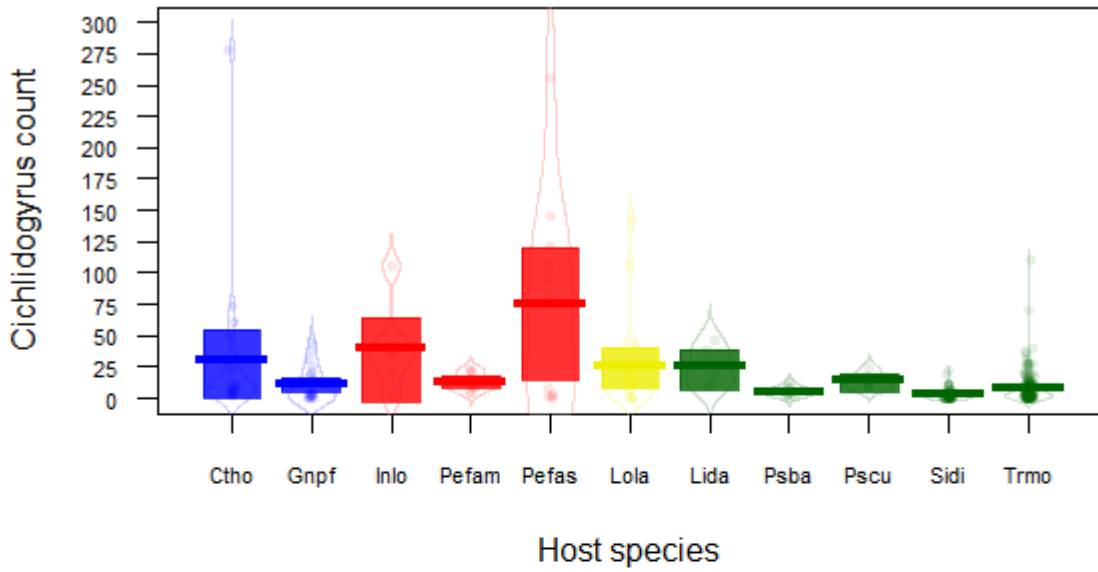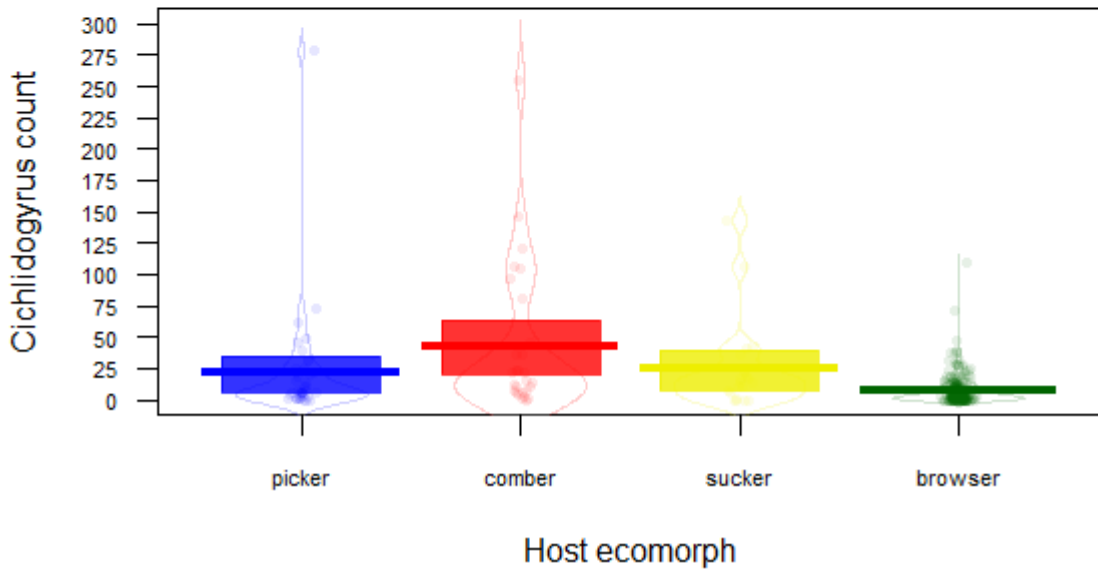

34

35 Fig. S2: Raw *Cichlidogyrus* counts in ten Tropheini species (upper panel) and the four trophic  
 36 ecomorphs (lower panel). Colours refer to different ecomorphs. Plots are drawn in R using the  
 37 *pirateplot* function of the *yarr* package (Phillips, 2016). Points are raw data, beans illustrate density  
 38 of points, bars depict mean counts and boxes represent 95 % Bayesian Highest Density Intervals.

39

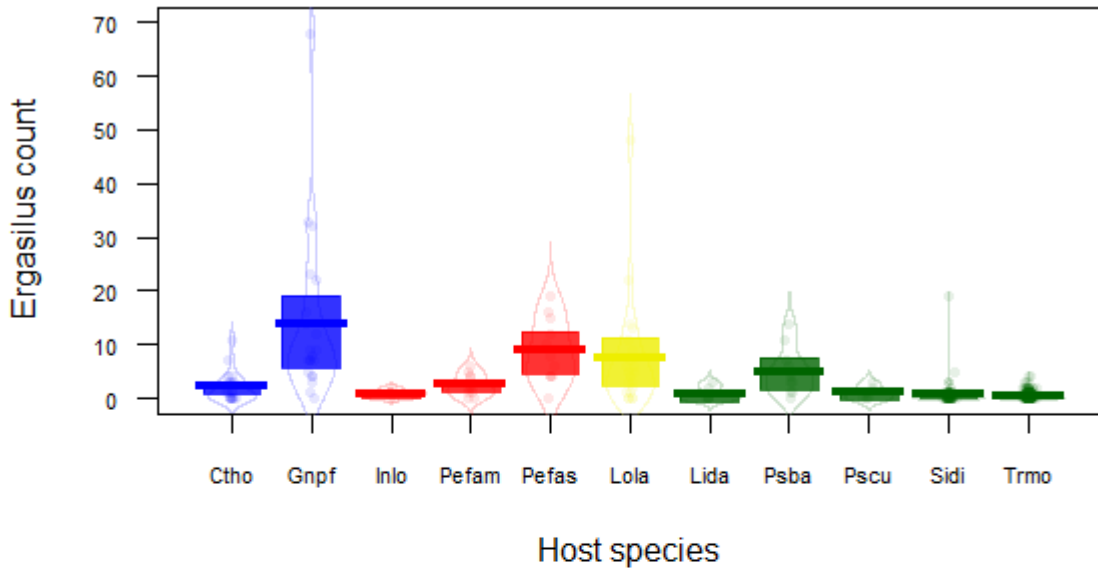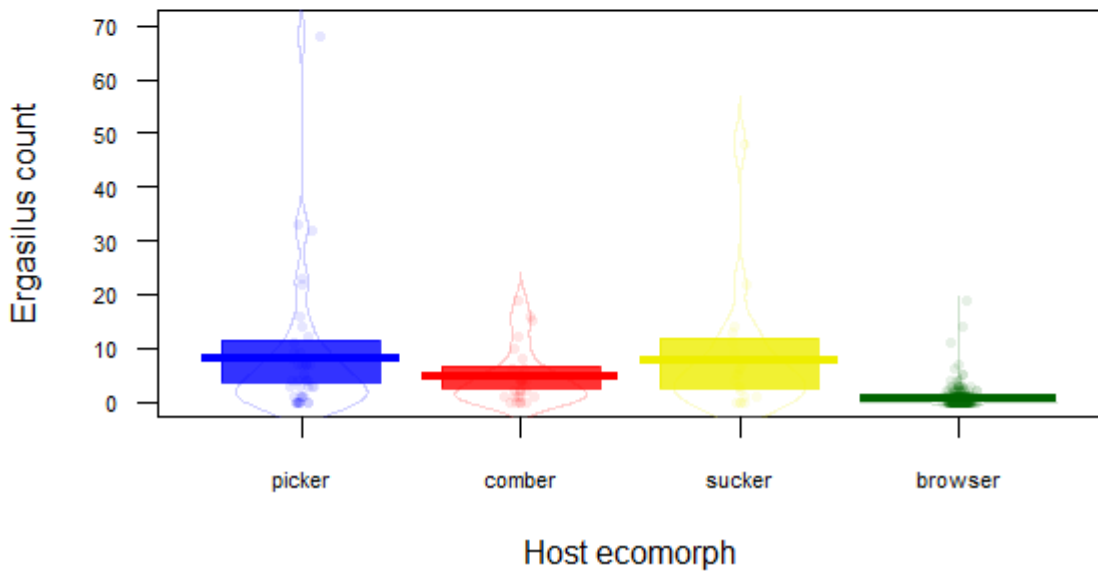

40

41 Fig. S3: Raw *Ergasilus* counts in ten Tropheini species (upper panel) and the four trophic ecomorphs  
 42 (lower panel). Colours refer to different ecomorphs. Plots are drawn in R using the *pirateplot*  
 43 function of the *yarr* package (Phillips, 2016). Points are raw data, beans illustrate density of points,  
 44 bars depict mean counts and boxes represent 95 % Bayesian Highest Density Intervals.

45

46 Supplementary references

47 Phillips N (2016) Package 'yarr' v0.1.2: A Companion to the e-Book "YaRrr!: The Pirate's Guide to R".

48 <https://cran.r-project.org/web/packages/yarr/index.html>
